# Supplementary material for: Molecular simulation-guided aptasensor design of robust and sensitive lateral flow strip for cadmium ion detection
Source: Royal Society of Chemistry journal article supplement (doi:10.1039/d3an00202k), 2023-01-01
Supplement: d3an00202k1.pdf [file d3an00202k1.pdf]

## Supporting Information

### Molecular Simulation Guided Aptasensor Design of Robust and Sensitive Lateral Flow Strip for Cadmium Ion Detection

Muhammad Irfan<sup>a</sup>, Ghulam Murtaza<sup>b</sup>, Shangnan Fu<sup>d</sup>, Ailiang Chen<sup>c\*</sup>, Feng Qu<sup>a\*</sup>, Xin Su<sup>d\*</sup>

<sup>a</sup> Key Laboratory of Molecular Medicine and Biotherapy, School of Life Science, Beijing Institute of Technology, Beijing, 100081, China

<sup>b</sup> School of Chemistry and Chemical Engineering, Beijing Institute of Technology, Beijing, 100081 China.

<sup>c</sup> Institute of Quality Standards & Testing Technology for Agro-Products, Chinese Academy of Agricultural Sciences, Beijing 100081, P. R. China

<sup>d</sup> College of Life Science and Technology, Beijing University of Chemical Technology, Beijing, 100029 China.

\* Corresponding authors:

X.S. [xinsu@mail.buct.edu.cn](mailto:xinsu@mail.buct.edu.cn)

A.C. [ailiang.chen@gmail.com](mailto:ailiang.chen@gmail.com)

F.Q. [qufengqu@bit.edu.cn](mailto:qufengqu@bit.edu.cn)

#### Table of contents

Figure S1: Secondary structure based hybridization prediction of aptamer with probe 1

Figure S2: Change in binding affinity of aptamer with probe1 in presence of different concentrations of Cd<sup>2+</sup>.

Figure S3: *In silico* analysis of Cd<sup>2+</sup> binding with aptamer.

Figure S 4: Simulations oriented optimization of probe length based upon hybridization yield and ΔG.

Figure S5: Molecular simulations based sequence optimization of selected probe 30 nt.

TableS1: Table of mutated sequences of probe 30 nt for molecular simulations based sequence optimization.

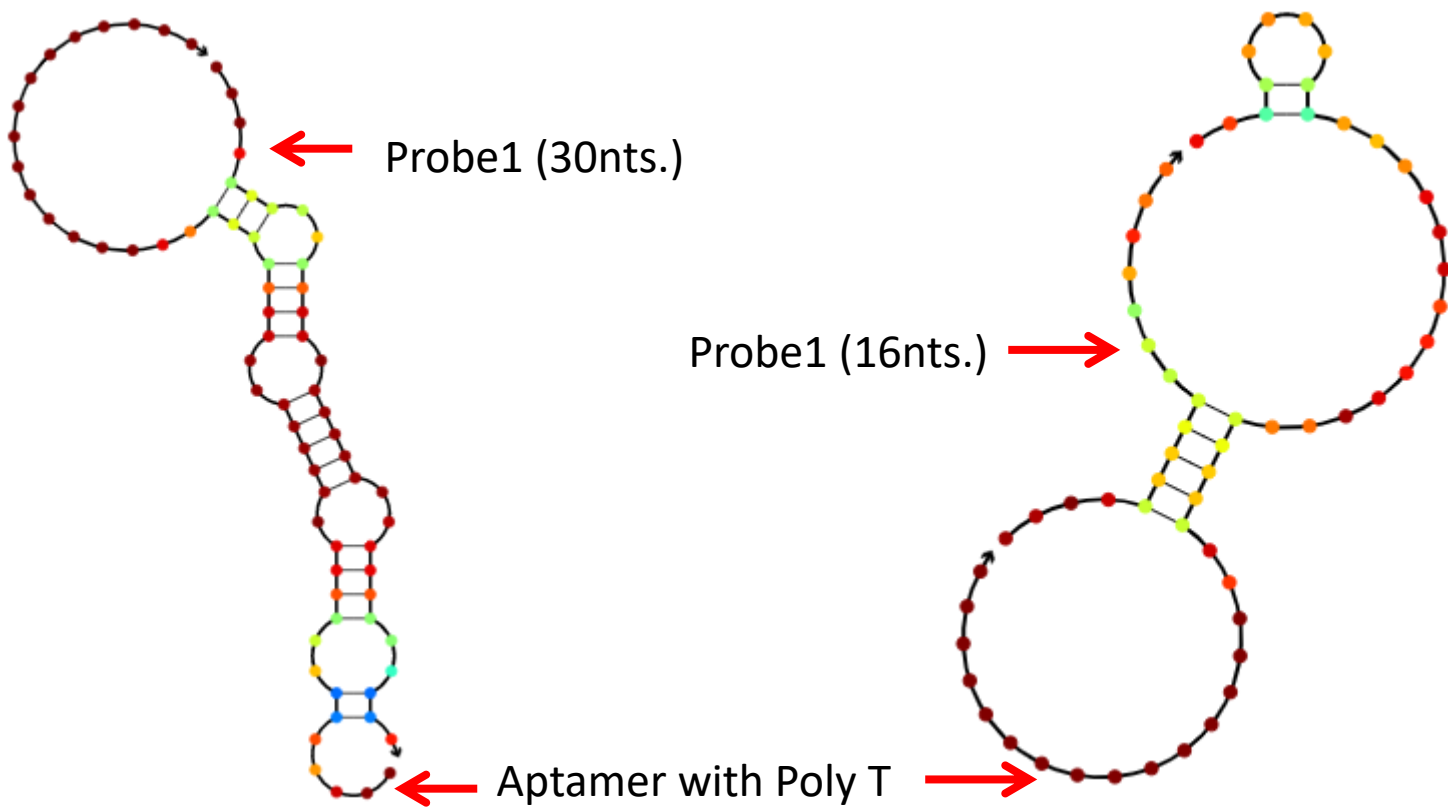

Figure S1: Secondary structure based hybridization prediction of aptamer with probe 1 (lengths 30nts and 16nts). An apparent change in secondary structure influenced by reduced numbers of nucleotides leads to change in  $\Delta G$ .

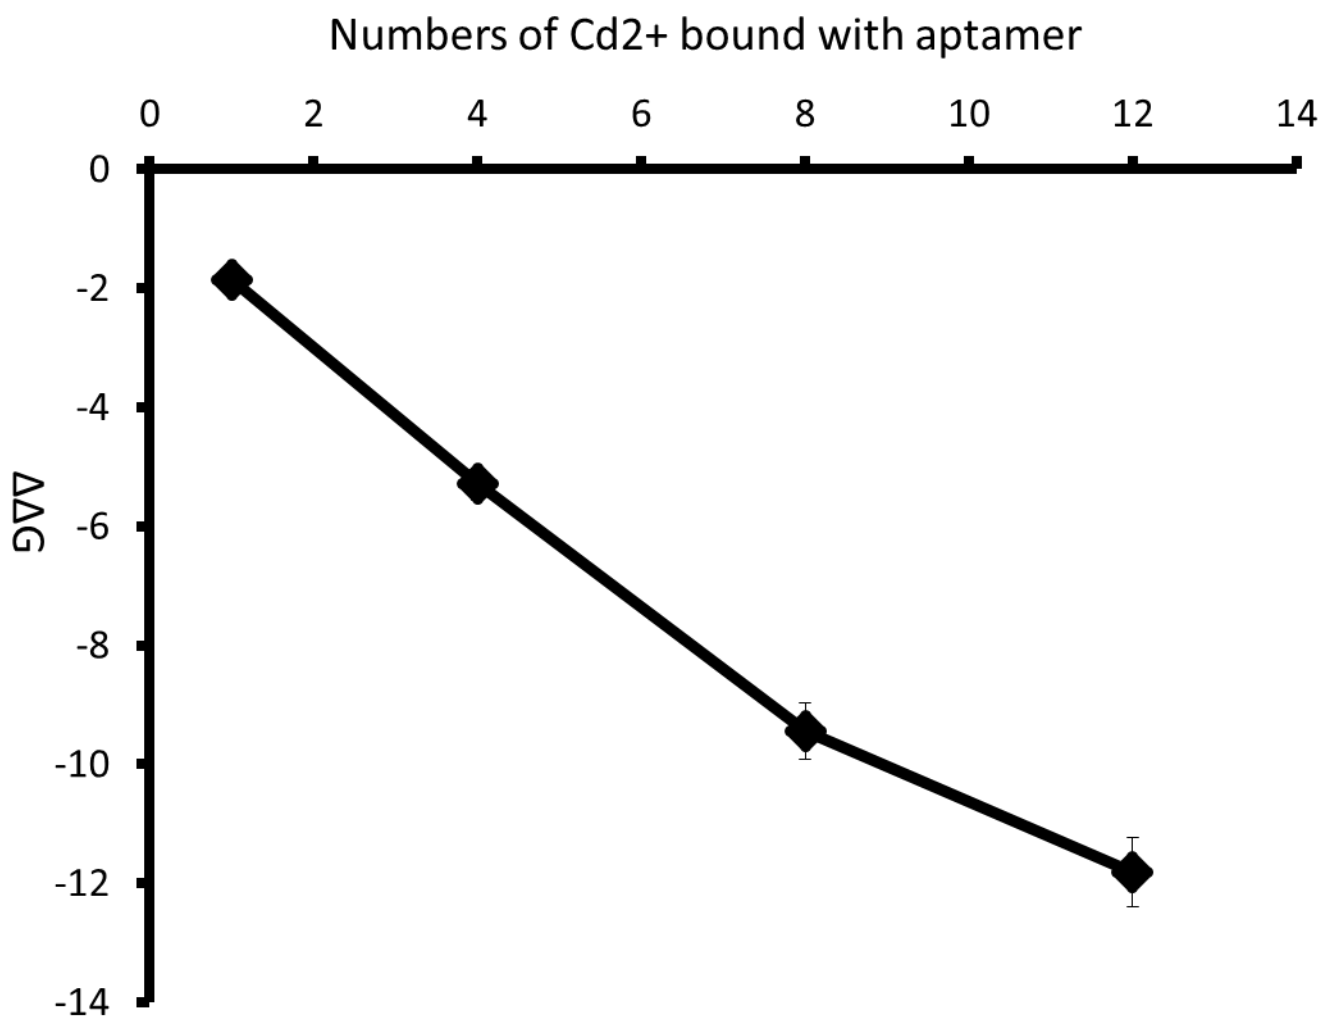

Figure S2: Change in binding affinity of aptamer with probe1 in presence of different concentrations of  $\text{Cd}^{2+}$ .  $\Delta\Delta G$  is the change in  $\Delta G$  when aptamer hybridized with probe1 in absence of  $\text{Cd}^{2+}$  as compared to aptamer/ $\text{Cd}^{2+}$  (1,4,8, and 12) complexes bind with probe1.

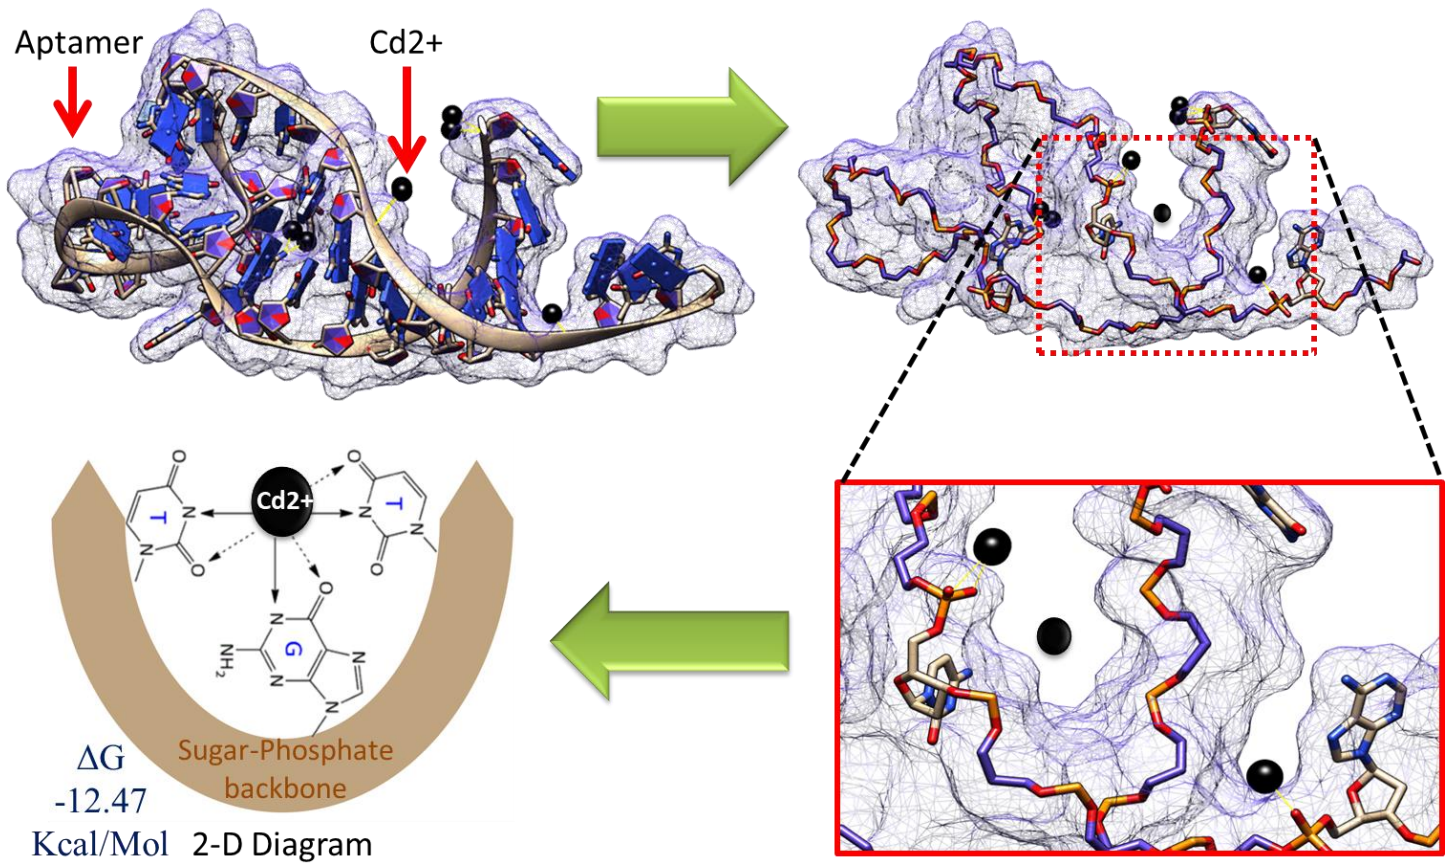

Figure S3: *In silico* analysis of Cd<sup>2+</sup> binding with aptamer. Binding of single Cd<sup>2+</sup> is characterized at the end in form of 2D diagram, which shows tendency of Cd<sup>2+</sup> toward G and T.

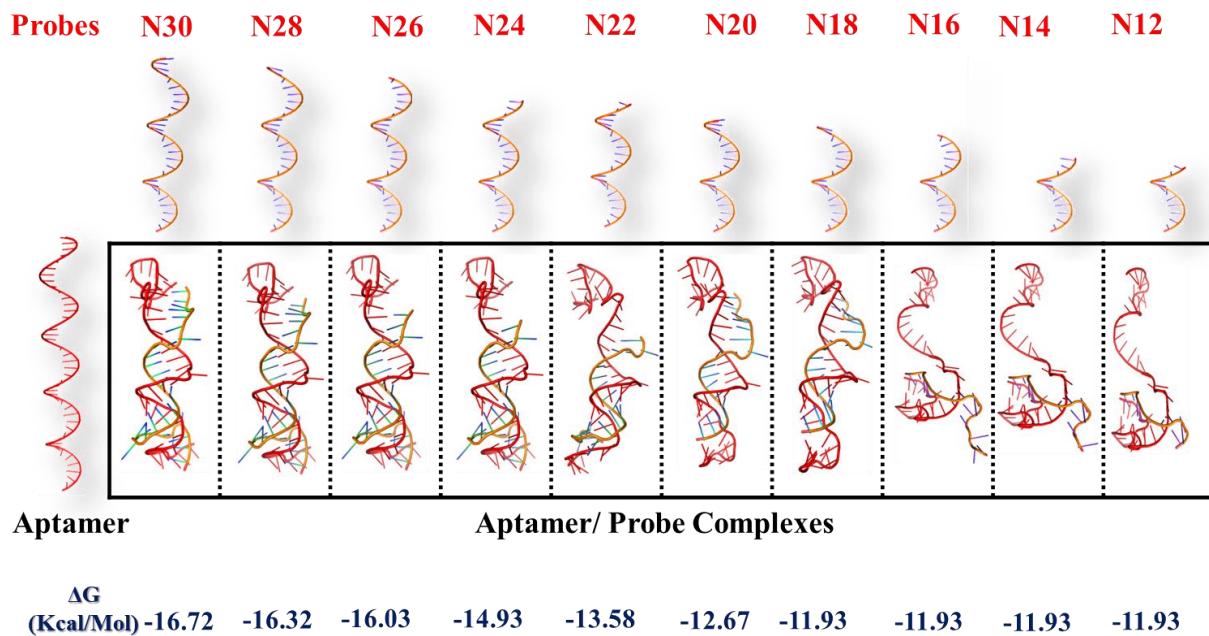

Figure S 4: Simulations oriented optimization of probe length based upon hybridization Yield and  $\Delta G$ . The simulated presentations of aptamer hybridization with different lengths of probes, showing the conformational changes directly impacted by length which influenced the  $\Delta G$  that leads to the hybridization yield.

|                             |                                                                                   |                                                                                   |                                                                                   |                                                                                   |                                                                                    |                                                                                     |                                                                                     |                                                                                     |
|-----------------------------|-----------------------------------------------------------------------------------|-----------------------------------------------------------------------------------|-----------------------------------------------------------------------------------|-----------------------------------------------------------------------------------|------------------------------------------------------------------------------------|-------------------------------------------------------------------------------------|-------------------------------------------------------------------------------------|-------------------------------------------------------------------------------------|
| Complex (Apt. and probe)    |  |  |  |  |   |  |  |  |
| Mutation                    | Wild Type                                                                         | 1-2                                                                               | 3-4                                                                               | 5-6                                                                               | 7-8                                                                                | 9-10                                                                                | 11-12                                                                               | 13-14                                                                               |
| $\Delta G^\circ$ (kcal/mol) | -16.72                                                                            | -16.27                                                                            | -16.20                                                                            | -14.80                                                                            | -15.80                                                                             | -15.90                                                                              | -14.88                                                                              | -15.35                                                                              |
| HY <sup>#</sup> (%)         | 100                                                                               | 95.50                                                                             | 97.80                                                                             | 73.30                                                                             | 91.90                                                                              | 92.60                                                                               | 75.60                                                                               | 83.00                                                                               |
| Complex (Apt. and probe)    |  |  |  |  |  |  |  |  |
| Mutation                    | 15-16                                                                             | 17-18                                                                             | 19-20                                                                             | 21-22                                                                             | 23-24                                                                              | 25-26                                                                               | 27-28                                                                               | 29-30                                                                               |
| $\Delta G^\circ$ (kcal/mol) | -11.44                                                                            | -13.64                                                                            | -13.47                                                                            | -13.83                                                                            | -12.59                                                                             | -16.01                                                                              | -16.18                                                                              | -16.27                                                                              |
| HY <sup>#</sup> (%)         | 26.10                                                                             | 61.20                                                                             | 59.10                                                                             | 68.60                                                                             | 47.00                                                                              | 80.90                                                                               | 90.00                                                                               | 95.60                                                                               |

HY<sup>#</sup> is hybridization yield.

Figure S5: Molecular simulations based sequence optimization of selected probe 30 nt. The 15 mutated sequences were generated by two consecutive mutations in each sequence starting from 1-2 position till end 29-30. Mutations were made such in a way that a purine is substituted with purine (A→G/G→A) and pyrimidine with pyrimidine (T→C/C→T). The molecular simulation complexes are shown along with binding free energies and hybridization yields.

TableS1: Table of mutated sequences of probe 30 nt for molecular simulations based sequence optimization.

| No. | Sequence                                 | Mutation  |
|-----|------------------------------------------|-----------|
| 1.  | CCTGACAACACCATAATAAAAACCAACACG           | Wild type |
| 2.  | <b>TT</b> GACAACACCATAATAAAAACCAACACG    | 1-2       |
| 3.  | <b>CC</b> ACAACACCATAATAAAAACCAACACG     | 3-4       |
| 4.  | CCTG <b>GT</b> AACACCATAATAAAAACCAACACG  | 5-6       |
| 5.  | CCTGAC <b>GG</b> CACCATAATAAAAACCAACACG  | 7-8       |
| 6.  | CCTGACAAT <b>GC</b> CATAATAAAAACCAACACG  | 9-10      |
| 7.  | CCTGACAACAT <b>TT</b> ATAATAAAAACCAACACG | 11-12     |
| 8.  | CCTGACAACACC <b>GC</b> AATAAAAACCAACACG  | 13-14     |
| 9.  | CCTGACAACACCAT <b>GG</b> TAAAAACCAACACG  | 15-16     |
| 10. | CCTGACAACACCATAA <b>CG</b> AAAACCAACACG  | 17-18     |
| 11. | CCTGACAACACCATAATA <b>GG</b> AACCAACACG  | 19-20     |
| 12. | CCTGACAACACCATAATAAA <b>GG</b> CCAACACG  | 21-22     |
| 13. | CCTGACAACACCATAATAAAA <b>TT</b> AACACG   | 23-24     |
| 14. | CCTGACAACACCATAATAAAAAC <b>GG</b> CACG   | 25-26     |
| 15. | CCTGACAACACCATAATAAAAACCAAT <b>GC</b> G  | 27-28     |
| 16. | CCTGACAACACCATAATAAAAACCAACAT <b>A</b>   | 29-30     |
